# Supplementary material
Source: PubMed Central journal article supplement (PMC3352441)
Supplement: eva0001-0319-SD1.pdf [file eva0001-0319-SD1.pdf]

# Supplementary information

## Background data

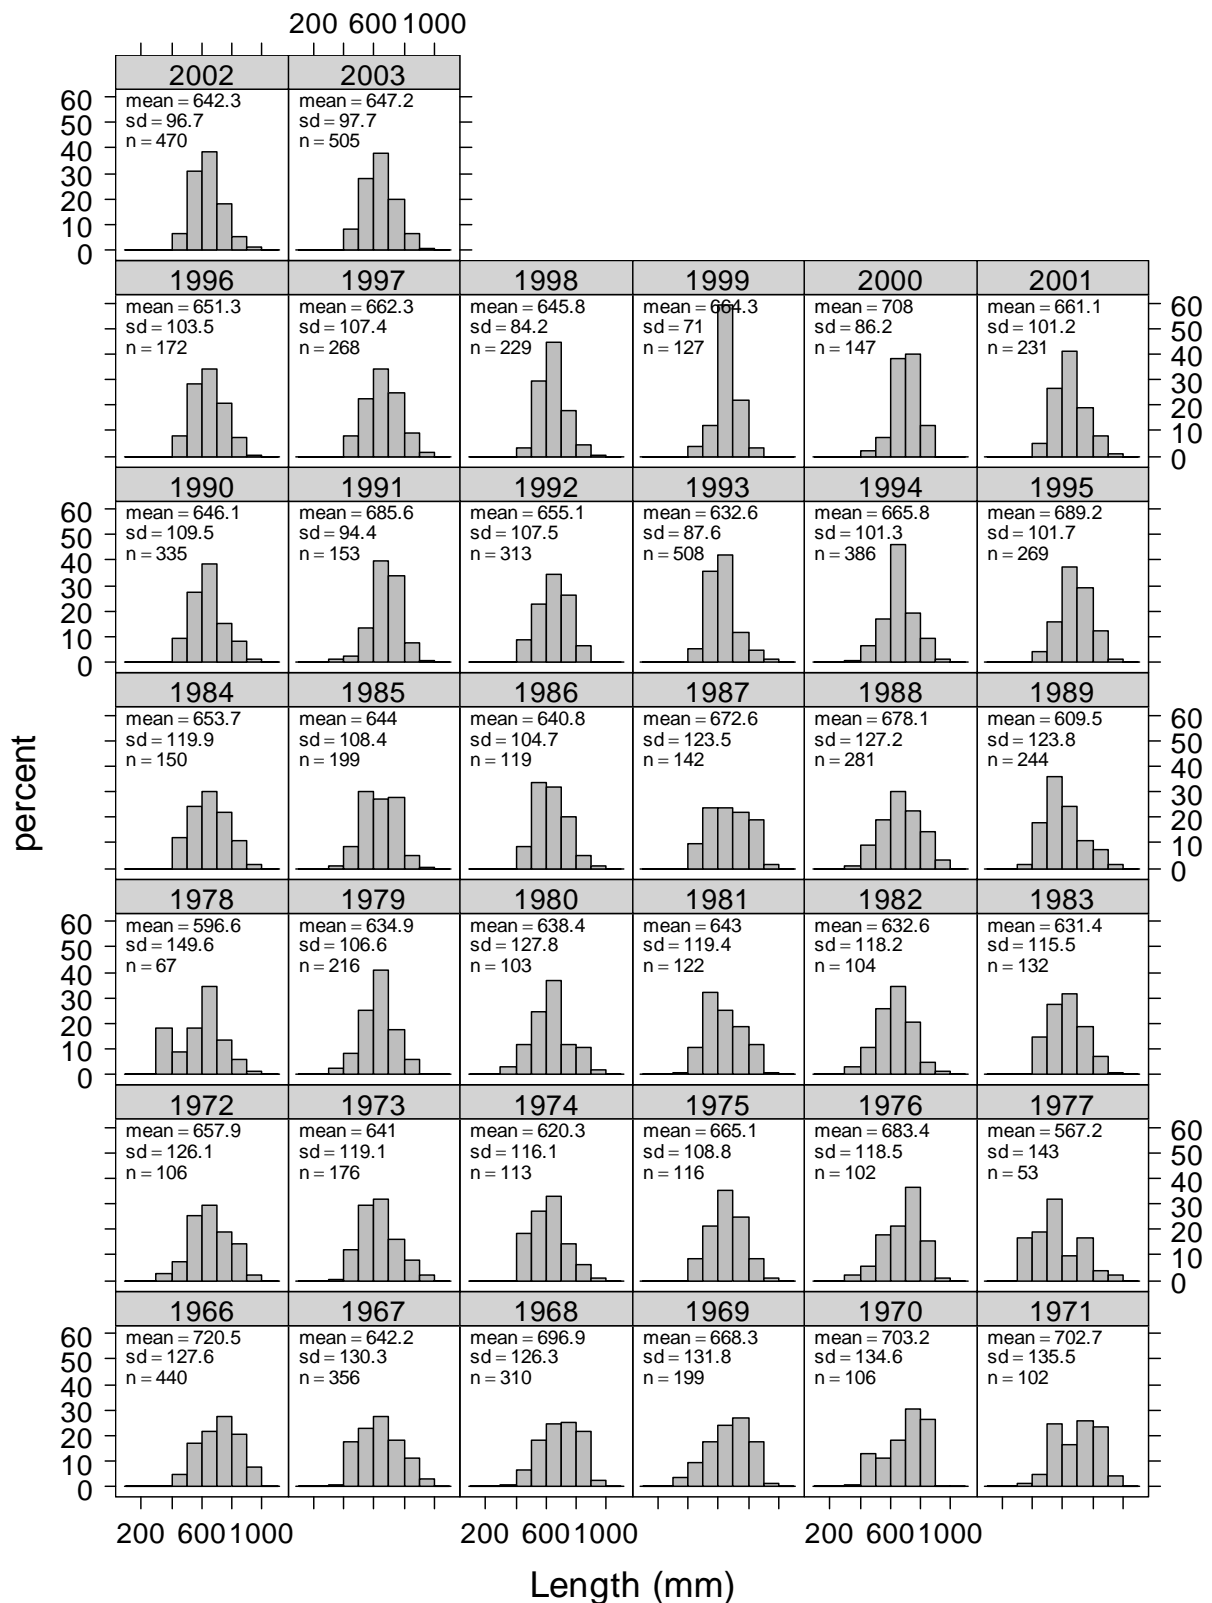

**Fig. S1.** Annual length distributions of mature fish caught in the Hunderfossen fish trap over the 1965 to 2003 period. There has been a significant ( $P < 0.00001$ ) decrease of  $0.64 \pm 0.11$  mm per year in mean spawning size over time. Furthermore, the variation coefficient has decreased by more than 50% over the study period.

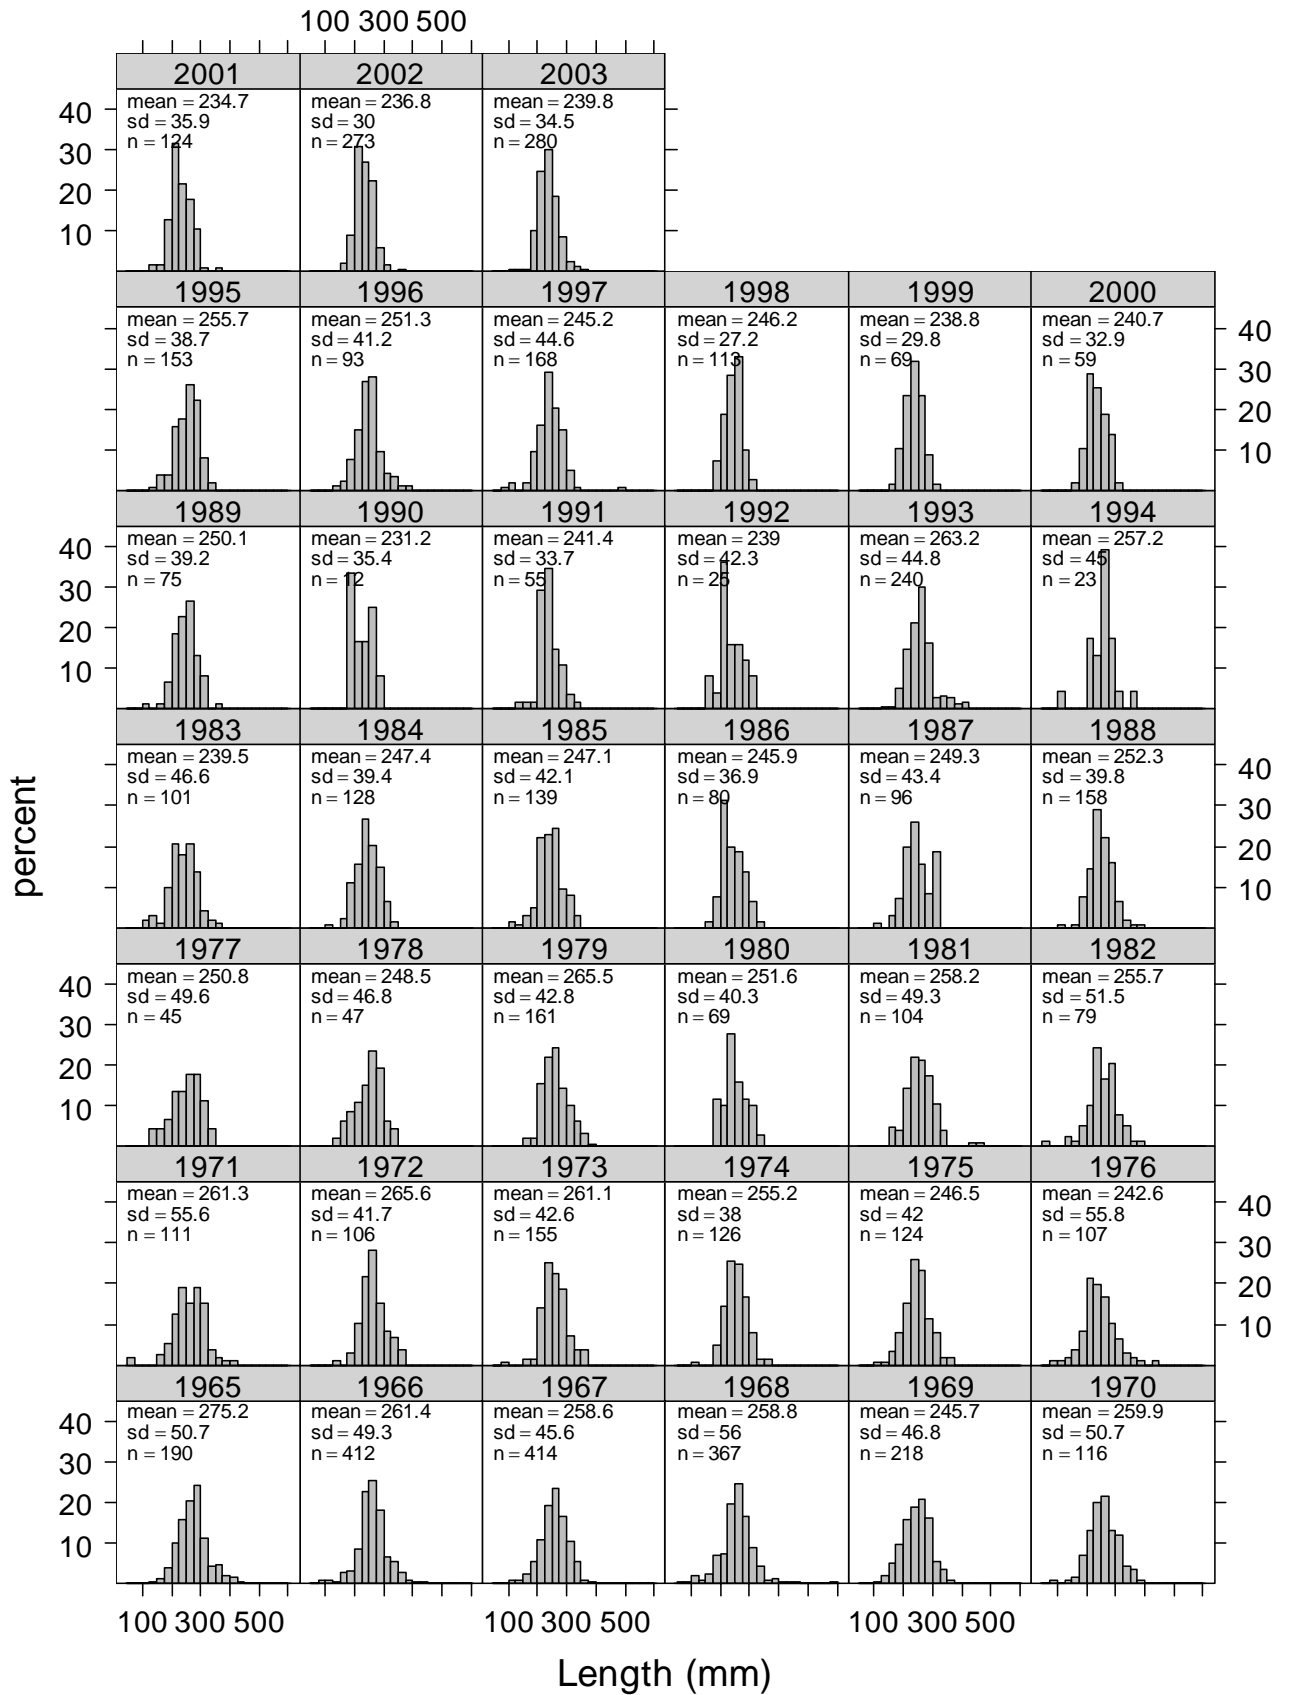

**Fig S2.** Annual back-calculated smolt length distributions for brown trout caught in the Hunderfossen fish trap over the 1965 to 2003 period. There has been a significant negative linear trend over the period with the smolt size decreasing by  $0.52 \pm 0.05$  mm per year ( $P < 0.00001$ ).

## Supplementary Tables

**Table S1.** Parameter estimates for vital rates (dependent variables) as function of individual covariates. The maturation model has been fitted using GAMM (only fixed effects are provided), whereas the lower ones all have been derived from the most supported Burnham model (see model 1, Table S1). All covariates have been standardised to mean =0 and sd=1 ( $\text{mean}_{\text{length}} = 658.5$ ,  $\text{s.d.}_{\text{length}} = 115.4$ ;  $\text{mean}_{\text{length}^2} = 446967$ ,  $\text{s.d.}_{\text{length}^2} = 154621$ ), and all parameters are estimated on a logit-scale.  $\chi^2$  is the test statistics for estimated degrees of freedom (edf) which is estimated for the GAM smoothing functions (s()).

| Dependent variable                       | Predictor variable    | Estimate | S.E.   | z or $\chi^2$ | P   |
|------------------------------------------|-----------------------|----------|--------|---------------|-----|
| Pr(maturing   survives to spawning)      |                       |          |        |               |     |
|                                          | Intercept             | -0.8346  | 0.0205 | -40.56        | *** |
|                                          | s(age,length, by=dec) | 2.014    |        | - 4130.5      | *** |
|                                          | s(temp, by=dec)       | 2.991    |        | - 206.3       | *** |
| a=1 survival probability                 |                       |          |        |               |     |
|                                          | intercept             | 1.4628   | 0.2768 |               |     |
|                                          | length                | 2.2930   | 0.4753 |               |     |
|                                          | length <sup>2</sup>   | -2.1472  | 0.5310 |               |     |
|                                          | tot-P                 | -0.1804  | 0.1044 |               |     |
|                                          | temperature           | 0.2243   | 0.1002 |               |     |
| a=2 lake fishing probability (odd year)  |                       |          |        |               |     |
|                                          | intercept             | -0.3667  | 0.2212 |               |     |
|                                          | length                | -0.3308  | 0.0780 |               |     |
| a=2 lake fishing probability (even year) |                       |          |        |               |     |
|                                          | intercept             | -0.7481  | 0.2714 |               |     |
|                                          | length                | -0.2038  | 0.1257 |               |     |
| a=1 probability of using the fish ladder |                       |          |        |               |     |
|                                          | intercept             | -0.8211  | 0.1766 |               |     |
|                                          | length                | 2.3112   | 0.7540 |               |     |
|                                          | length <sup>2</sup>   | -2.6266  | 0.7223 |               |     |
|                                          | temperature           | 0.3511   | 0.0628 |               |     |
|                                          | discharge             | 0.4065   | 0.1322 |               |     |
|                                          | length*discharge      | 0.6959   | 0.2223 |               |     |

\*\*\*\* $P < 0.00001$

Dec = decennium

**Table S2.** Model ranks of Burnham models fitted combined live-dead encounter data from the Mjøsa-Hunderfossen brown trout system covering the 1966–2003 period. In total, 5346 wild trout individuals were included in the analysis. The table shows the ranking of  $a=1$  (i.e., period at/or following the tagging occasion) models as the size-related processes were assumed to be most prominent over this period. The remaining model structure used was:  $S_{a>1}(la(dec),sp(dec) | c)$ ,  $p_{a>1}(la(dec),sp(dec) | c)$ ,  $r_{a>1}(la(dec),sp(dec) | c)$ ,  $F(la(.),sp(.))$ . AICc = Akaike Information Criterion = deviance + 2\*Np, where Np is number of estimated parameters. The model with the lowest AIC is the model that explains most of the deviance per parameter used. AIC-weight =  $\exp(-0.5\Delta QAI Cc_i) / \sum \exp(-0.5\Delta QAI Cc_i)$ , where  $\Delta QAI Cc = QAI Cc_i - QAI Cc_{min}$ .

| Model                                                                                                                                                                                                   | AICc   | AICc-weight | Np  | deviance |
|---------------------------------------------------------------------------------------------------------------------------------------------------------------------------------------------------------|--------|-------------|-----|----------|
| <b>Varying <math>S_{a=1}</math>; <math>p(\text{length}+\text{length}^2+\text{te} + \text{dis} + \text{dis}*\text{length}   c)</math>, <math>r(\text{length}+\text{length}^2+\text{time}   c)</math></b> |        |             |     |          |
| 1. $\text{length}+\text{length}^2+\text{tot-P} + \text{te(L)}+ sp(dec),la(dec)   c$                                                                                                                     | 8616.4 | 0.86        | 118 | 8380.4   |
| 2. $\text{length}+\text{length}^2 + \text{te(L)}+ sp(dec),la(dec)   c$                                                                                                                                  | 8620.0 | 0.14        | 116 | 8388     |
| 3. $\text{length}+\text{length}^2+\text{time}   c$                                                                                                                                                      | 8643.2 | 0.00        | 162 | 8319.2   |
| 4. $\text{length}$                                                                                                                                                                                      | 8655.7 | 0.00        | 103 | 8449.7   |
| 5. $\text{length}+\text{length}^2+sp(dec),la(dec)   c$                                                                                                                                                  | 8658.3 | 0.00        | 114 | 8430.3   |
| 6. $\text{constant}   c$                                                                                                                                                                                | 8689.6 | 0.00        | 102 | 8485.6   |
| <b>Varying <math>r_{a=1}</math>; <math>S(\text{time}   c)</math>, <math>p(\text{length}+\text{length}^2+\text{te} + \text{dis} + \text{dis}*\text{length}   c)</math></b>                               |        |             |     |          |
| 7. $\text{length}+\text{length}^2+sp(dec),la(dec)   c$                                                                                                                                                  | 8696.6 | 0.91        | 166 | 8364.6   |
| 8. $\text{length}   c$                                                                                                                                                                                  | 8701.5 | 0.08        | 156 | 8389.5   |
| 9. $\text{length}+\text{length}^2   c$                                                                                                                                                                  | 8704.7 | 0.02        | 158 | 8388.7   |
| 10. $\text{time}   c$                                                                                                                                                                                   | 8726.0 | 0.00        | 219 | 8288.0   |
| 11. $\text{constant}   c$                                                                                                                                                                               | 8742.4 | 0.00        | 156 | 8430.4   |
| <b>Varying <math>p_{a=1}</math>; <math>S(\text{time}   c)</math>, <math>r(\text{time}   c)</math></b>                                                                                                   |        |             |     |          |
| 12. $\text{length}+\text{length}^2+\text{te} + \text{dis} + \text{dis}*\text{length}   c$                                                                                                               | 8780.3 | 0.95        | 220 | 8340.3   |
| 13. $\text{length}+\text{length}^2+\text{te} + \text{te}*\text{length} + \text{dis} + \text{dis}*\text{length}   c$                                                                                     | 8786.0 | 0.05        | 223 | 8340.0   |
| 14. $\text{length}+\text{length}^2+\text{time}   c$                                                                                                                                                     | 8807.2 | 0.00        | 262 | 8283.2   |
| 15. $\text{time}   c$                                                                                                                                                                                   | 8832   | 0.00        | 252 | 8328     |
| 16. $\text{constant}   c$                                                                                                                                                                               | 8943.9 | 0.00        | 200 | 8336.3   |
| <b>All constant</b>                                                                                                                                                                                     |        |             |     |          |
| 17. $S(la(.),sp(.)),p(la(.),sp(.)),r(la(.),sp(.)),F(la(.),sp(.))$                                                                                                                                       | 9461.6 |             | 8   | 9445.6   |

la = non-spawning years, i.e., when the fish are in the lake

sp = spawning years

dec = decennium

te = river temperature, te(L) = lake temperature

dis = water discharge

c = tagging cohort group, i.e., either odd or even year

a = tagging age, i.e.,  $a=1$  at the tagging occasion

(.) = constant
